# Supplementary material
Source: Springer Nature journal article supplement (https://www.springermedizin.de/resource/supplementary/12874_2005_135_MOESM2_ESM.pdf/9433844)
Supplement: MOESM2 [file 9433844]

## SEARCH STRATEGY

Electronic literature search in MEDLINE and EMBASE (1996–January 2004) combining appropriate MESH terms, text words and word variants for the concept systematic review OR meta-analysis OR Medline AND chemical and pharmacologic phenomena OR biological phenomena OR cell phenomena OR immunity OR biological science OR investigative techniques OR laboratory animal science

Total citations identified: **4749**

Citations excluded after  
screening titles and / or abstracts:

**3232**

Citations of reviews judged useful for detailed evaluation: **1517**

Systematic reviews of animal studies **30**

Systematic reviews of 'bench' studies selected randomly **45**
